# Supplementary material
Source: PubMed Central journal article supplement (PMC6341297)

SUPPLEMENTARY DATA

**Supplementary Table 1. Human donor information**

| <b>Donor Age</b> | <b>Ethnicity/Race</b> | <b>Gender</b> | <b>BMI</b> | <b>Cause of Death</b> | <b>Tissue Source</b> |
|------------------|-----------------------|---------------|------------|-----------------------|----------------------|
| 3 months         | Caucasian             | M             | 17.4       | Anoxia                | NDRI                 |
| 10 months        | Caucasian             | F             | 16.1       | CVA                   | NDRI                 |
| 19 months        | Hispanic              | F             | 12.9       | Head Trauma           | NDRI                 |
| 4 years          | Caucasian             | F             | 19.0       | Head Trauma           | IIAM                 |
| 5 years          | African American      | F             | 15.9       | Anoxia                | NDRI                 |
| 10 years         | Caucasian             | M             | 19.3       | Head Trauma           | NDRI                 |

NDRI – National Disease Research Interchange

IIAM – International Institute for the Advancement of Medicine

CVA – Cerebrovascular accident

SUPPLEMENTARY DATA

**Supplementary Table 2. Primers used for islet gene expression**

| Gene          | Sequence                 |
|---------------|--------------------------|
| Atp2a2 F      | AGCCAGAGAGATGCCTGCTTAAA  |
| Atp2a2 R      | AGAGCAGGAGCATCATTCACACCA |
| Ccnd2 F       | GAGTGGGAACCTGGTAGTGTG    |
| Ccnd2 R       | CGCACAGAGCGATGAAGGT      |
| Cldn8 F       | GCAACCTACGCTCTTCAAATGG   |
| Cldn8 R       | TTCCCAGCGGTTCTCAAACAC    |
| Ddc F         | TAGCTGACTATCTGGATGGCAT   |
| Ddc R         | GTCCTCGTATGTTTCTGGCTC    |
| G6pc2 F       | ACCTGGTCCTTTCTGTGGAGTGTT |
| G6pc2 R       | TTCAAAGGCCTCGGCTACTAGCAT |
| Gcg F         | CATTCACCAGCGACTACAGCAA   |
| Gcg R         | TCATCAACCACTGCACAAAATCT  |
| Htr1d F       | ATCACCGATGCCCTGGAGTA     |
| Htr1d R       | GCCAGAAGAGTGGAGGGATG     |
| Htr2b F       | GAACAAAGCACAACTTCTGAGC   |
| Htr2b R       | CCGCGAGTATCAGGAGAGC      |
| Htr3a F       | CCTGGCTAACTACAAGAAGGGG   |
| Htr3a R       | TGCAGAAACTCATCAGTCCAGTA  |
| Ins2 F        | GGCTTCTTCTACACACCCAT     |
| Ins2 R        | CCAAGGTCTGAAGGTCACCT     |
| Mafa F        | CCTGTAGAGGAAGCCGAGGAA    |
| Mafa R        | CCTCCCCCAGTCGAGTATAGC    |
| Mafb 3' UTR F | CGAGGTCCGGGAGTAACTTTT    |
| Mafb 3' UTR R | CTTGGCGACTCCTTGGAATAA    |
| Mafb F        | AACGCGTCCAGCAGAAACA      |
| Mafb R        | AGCTGCTCCACCTGCTGAAT     |
| Prlr F        | CACTTGCTTACATGCTGCTTG    |
| Prlr R        | CAGGTGGTGA CTGTCCATTCA   |
| Slc18a1 F     | GTCCCGGAAGCTGGTGTG       |
| Slc18a1 R     | ACAGTGAGCAGCATATTGTCC    |
| Slc2a2 F      | GTAAATGGCAGCTTTCCGGTC    |
| Slc2a2 R      | CAGTTCGGCTATGACATCGGT    |
| Slc30a8 F     | AGCTTCCTGTGTTTCTAGGCCAT  |
| Slc30a8 R     | AATCTATTCCGACGGCTGCCTCAT |
| Tph1 F        | AACAAAGACCATTTCCTCCGAAAG |
| Tph1 R        | TGTAACAGGCTCACATGATTCTC  |
| Tph2 F        | TCGAAATCTTCGTGGACTGCG    |
| Tph2 R        | CGGATTCAGGGTCA CAATGGT   |

## SUPPLEMENTARY DATA

**Supplementary Figure 1. The three  $\beta$ MafBTg mouse lines characterized varied in their production of MafB within the islet  $\beta$  cell population.** The number islet MafA<sup>+</sup> Insulin<sup>+</sup> and MafB<sup>+</sup> Insulin<sup>+</sup> cells were divided by the total number of Insulin<sup>+</sup> cells to obtain the percent of MafA<sup>+</sup> and MafB<sup>+</sup>  $\beta$  cells within the total  $\beta$  cell population in the D-, A-, and E-lines. The D-line was the focus of subsequent experimentation because of the higher percentage of MafB<sup>+</sup>  $\beta$  cells.

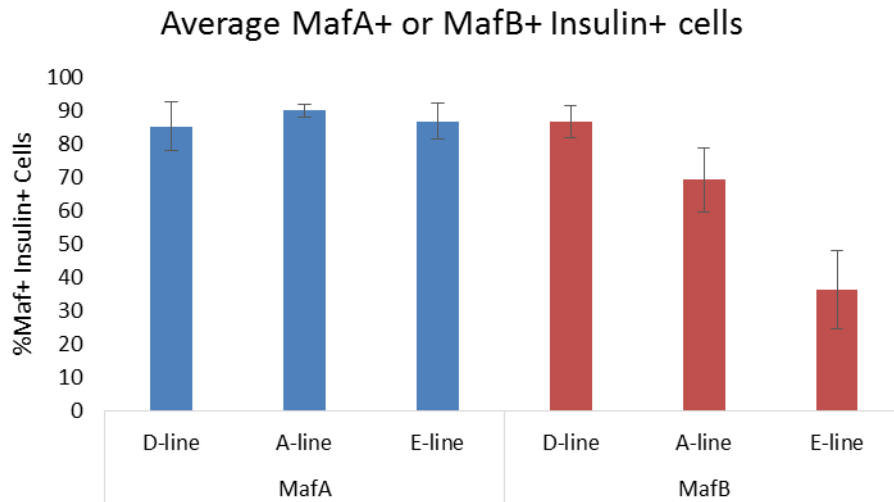

**Supplementary Figure 2. The methylation status of the 5'- and 3'- flanking region surrounding the human *MAFB* gene.** Note the similarity in the methylation state between young and old MAFB<sup>+</sup>  $\alpha$  and  $\beta$  cells, with hypomethylation proximal to the *MAFB* gene.

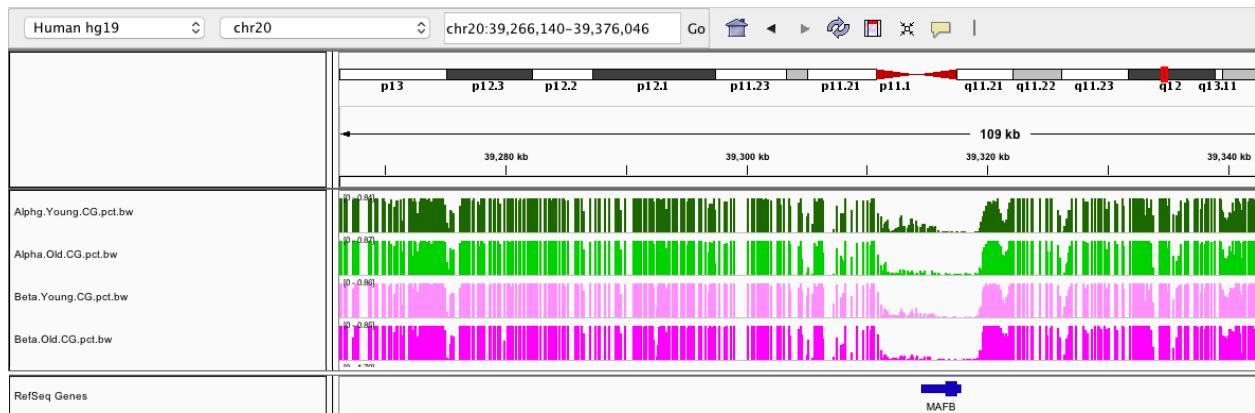

SUPPLEMENTARY DATA

**Supplementary Figure 3. Transgenic MafB expression is elevated at e15.5 and 2-months.** *MafA<sup>fl/fl</sup>* and  $\beta$ MafBTg RNA analyzed to delineate the endogenous *MafB* 3' untranslated region (UTR) and coding (endogenous + transgenic) qPCR signals. qPCR normalized to *Gapdh* expression. n=3-5, \*p<0.05.

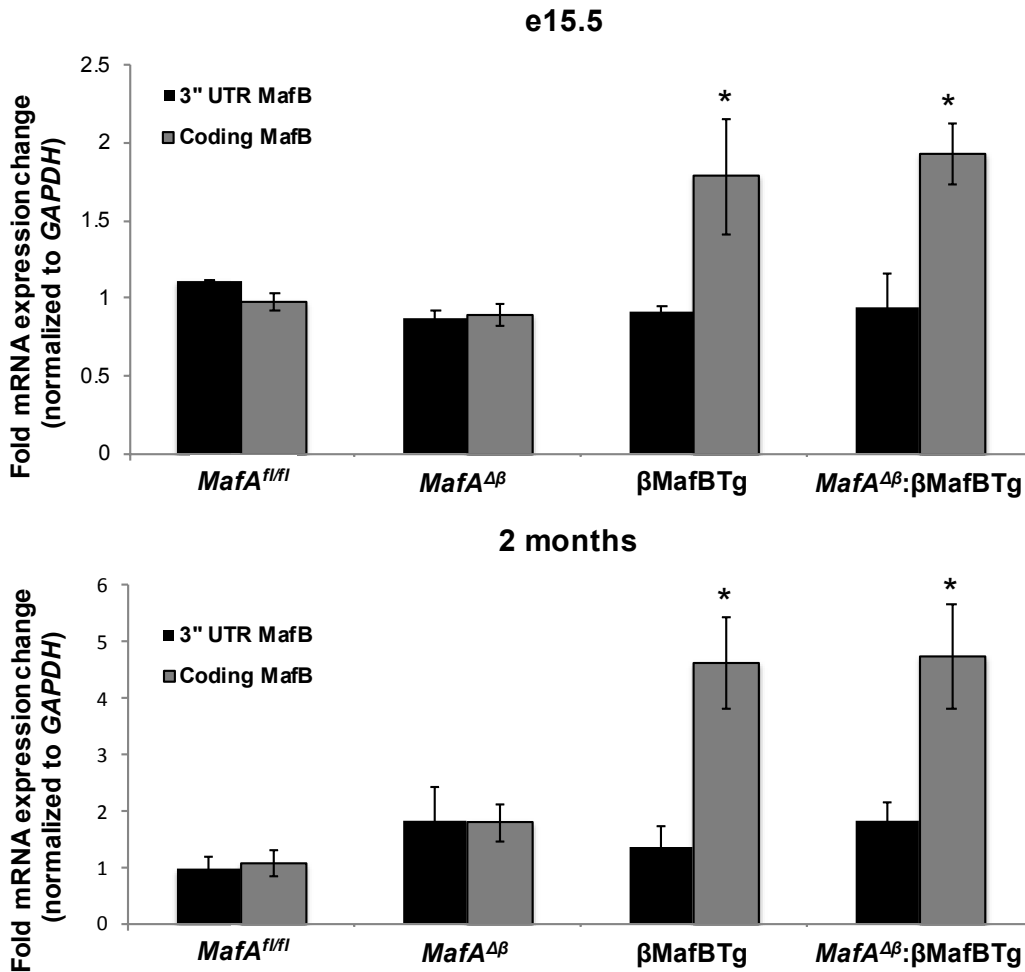

Supplement: DB180903SupplementaryData.pdf [file DB180903SupplementaryData.pdf]
